# Supplementary material for: The Buffering Effect of Spirituality at Work on the Mediated Relationship between Job Demands and Turnover Intention among Teachers
Source: MDPI journal article supplement (doi:10.3390/rel12090781), 2021-09-17
Supplement: s1 [file s1]

Archive with 1 entries (1 files):
- religions-1369776-supplementary.pdf
